# Supplementary material
Source: PubMed Central journal article supplement (PMC3648039)
Supplement: AEM.00083-13_zam999104389so1.pdf [file AEM.00083-13_zam999104389so1.pdf]

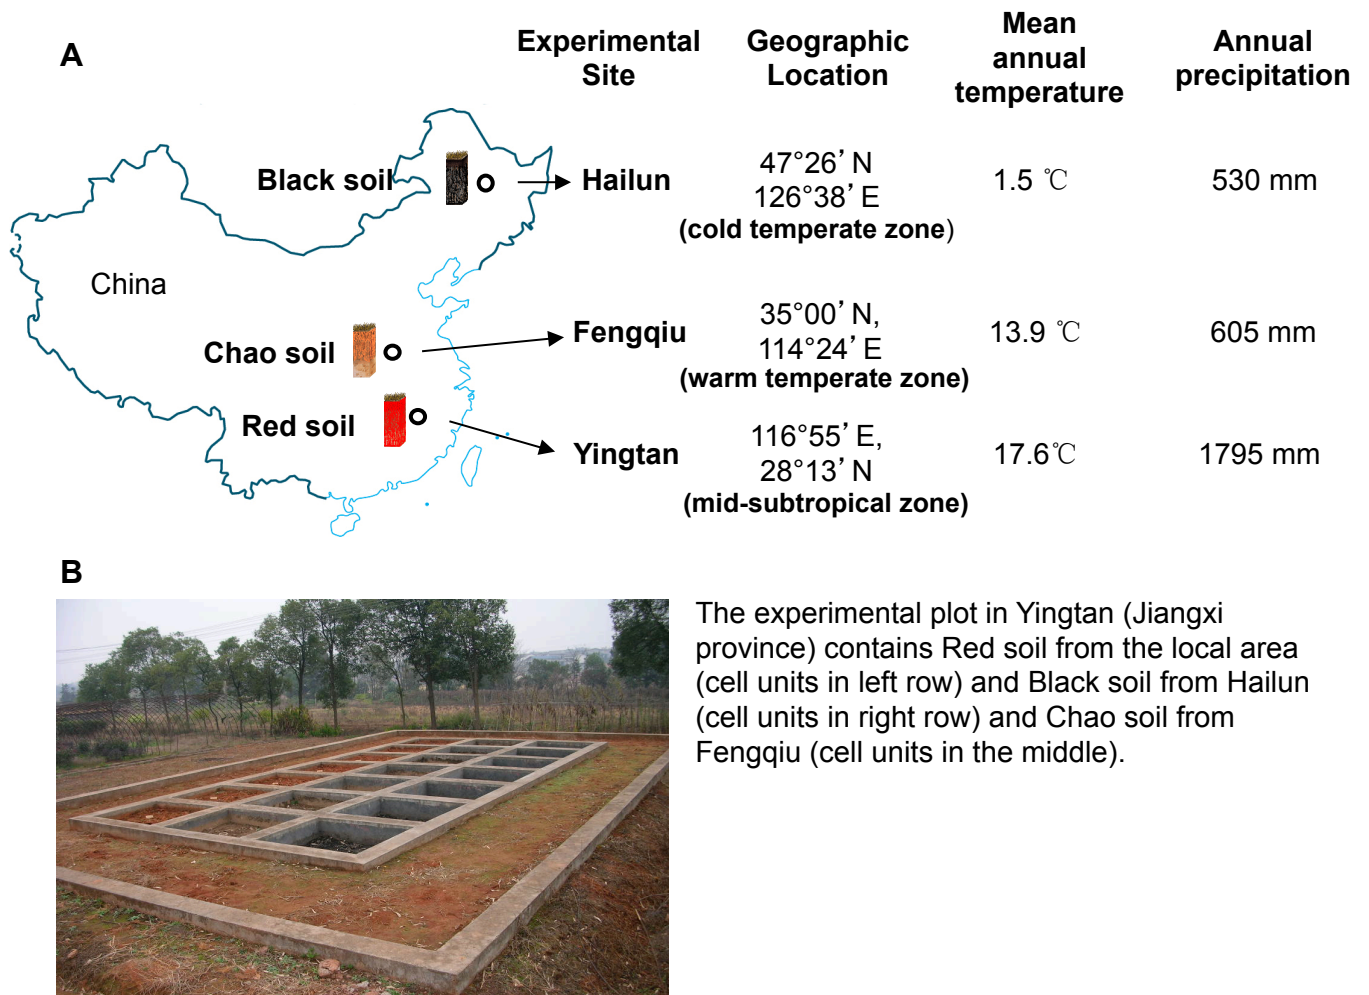

**Figure S1.** Geographic locations of the three reciprocal soil transplantation sites (A) and an overview of the experimental plot in Yingtan (B).

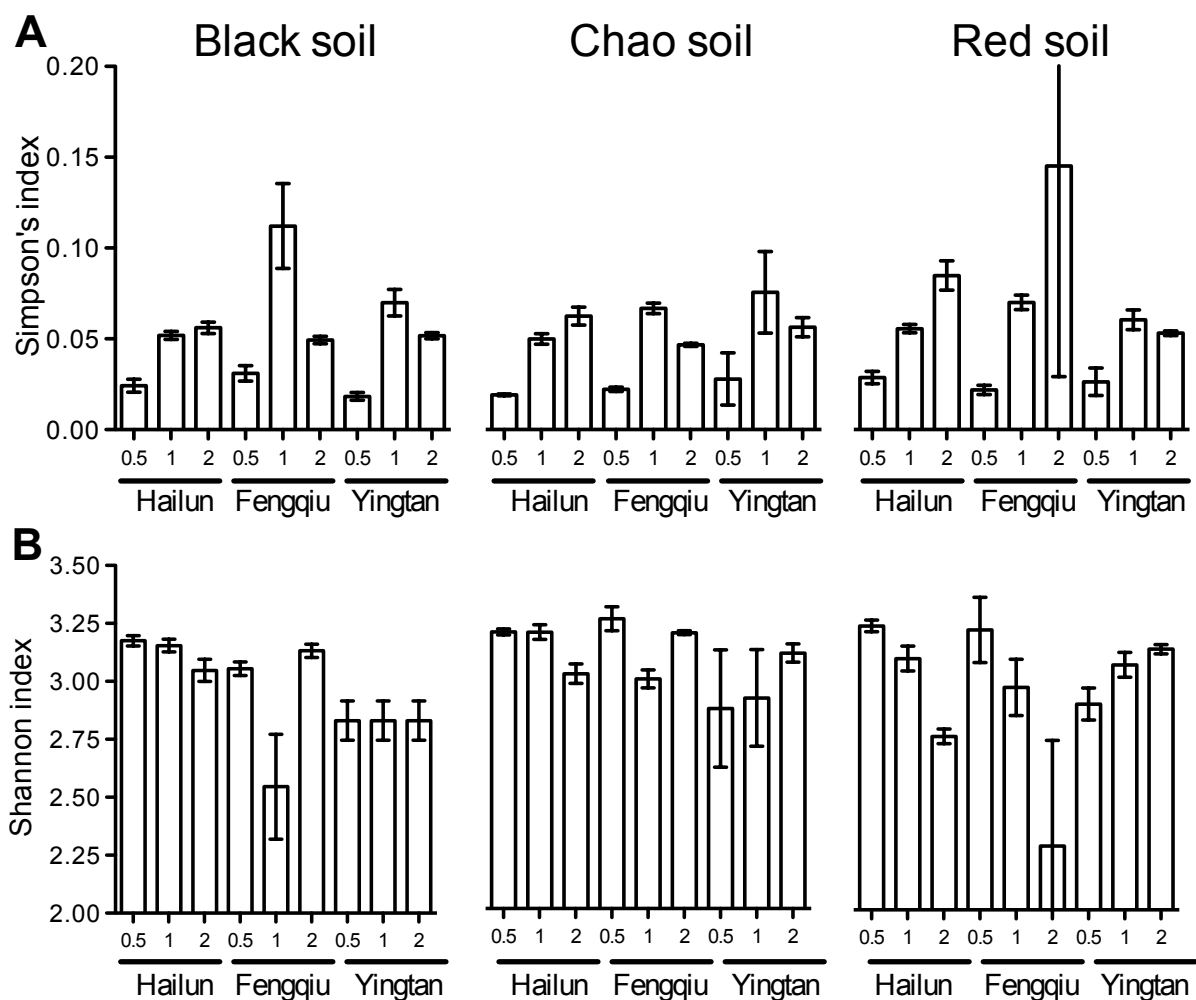

**Fig. S2.** Functional diversity of the bacterial community as expressed by the Simpson's and Shannon's indices calculated from the CLPP data. Results are means and standard errors of three replicates.

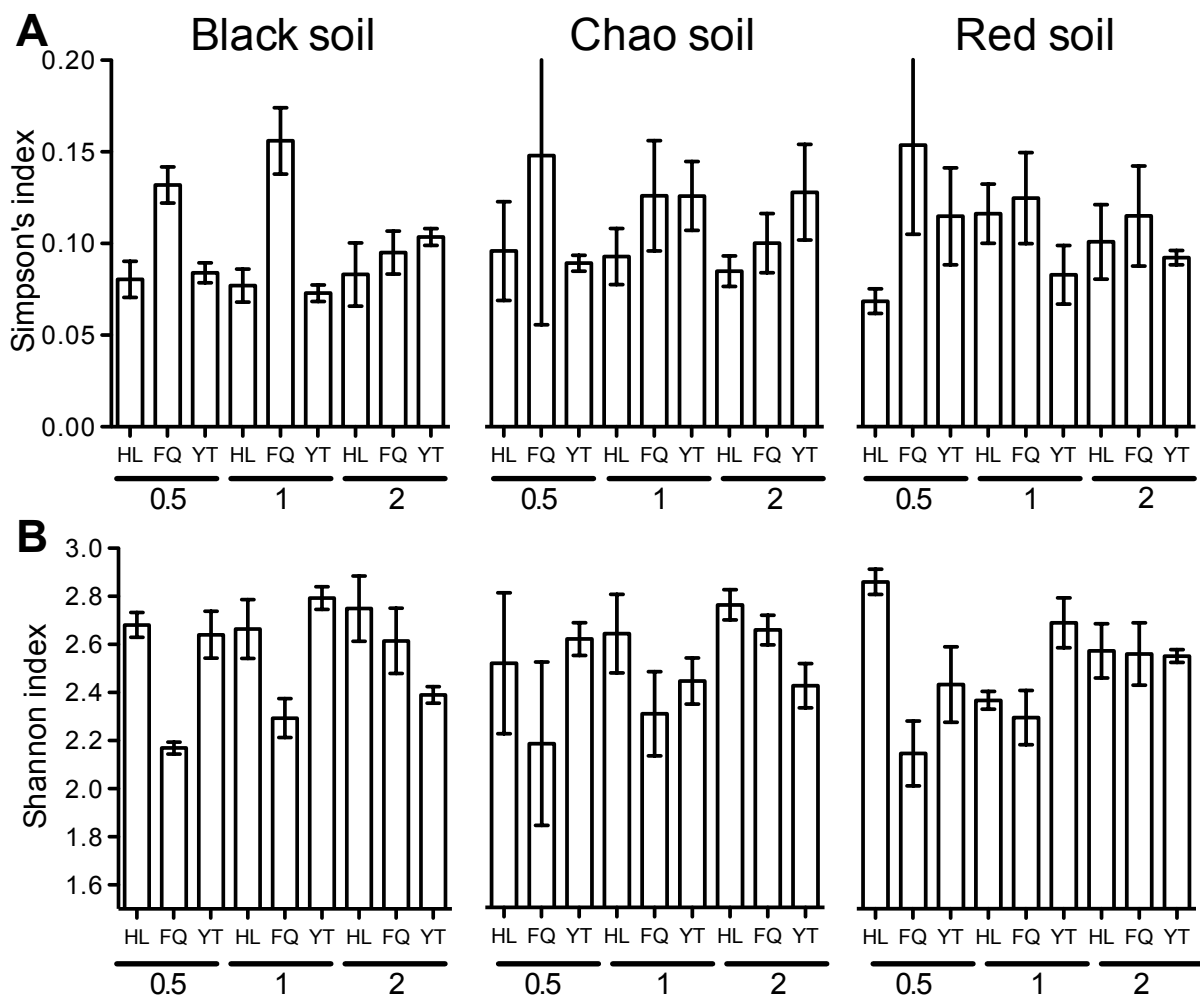

**Fig. S3.** Phylogenetic diversity of the bacterial community as expressed by the Simpson's and Shannon's indices calculated from the 16S rDNA DGGE data. Results are means and standard errors of three replicates. HL, Hailun; FQ, Fengqiu; YT, Yingtan.

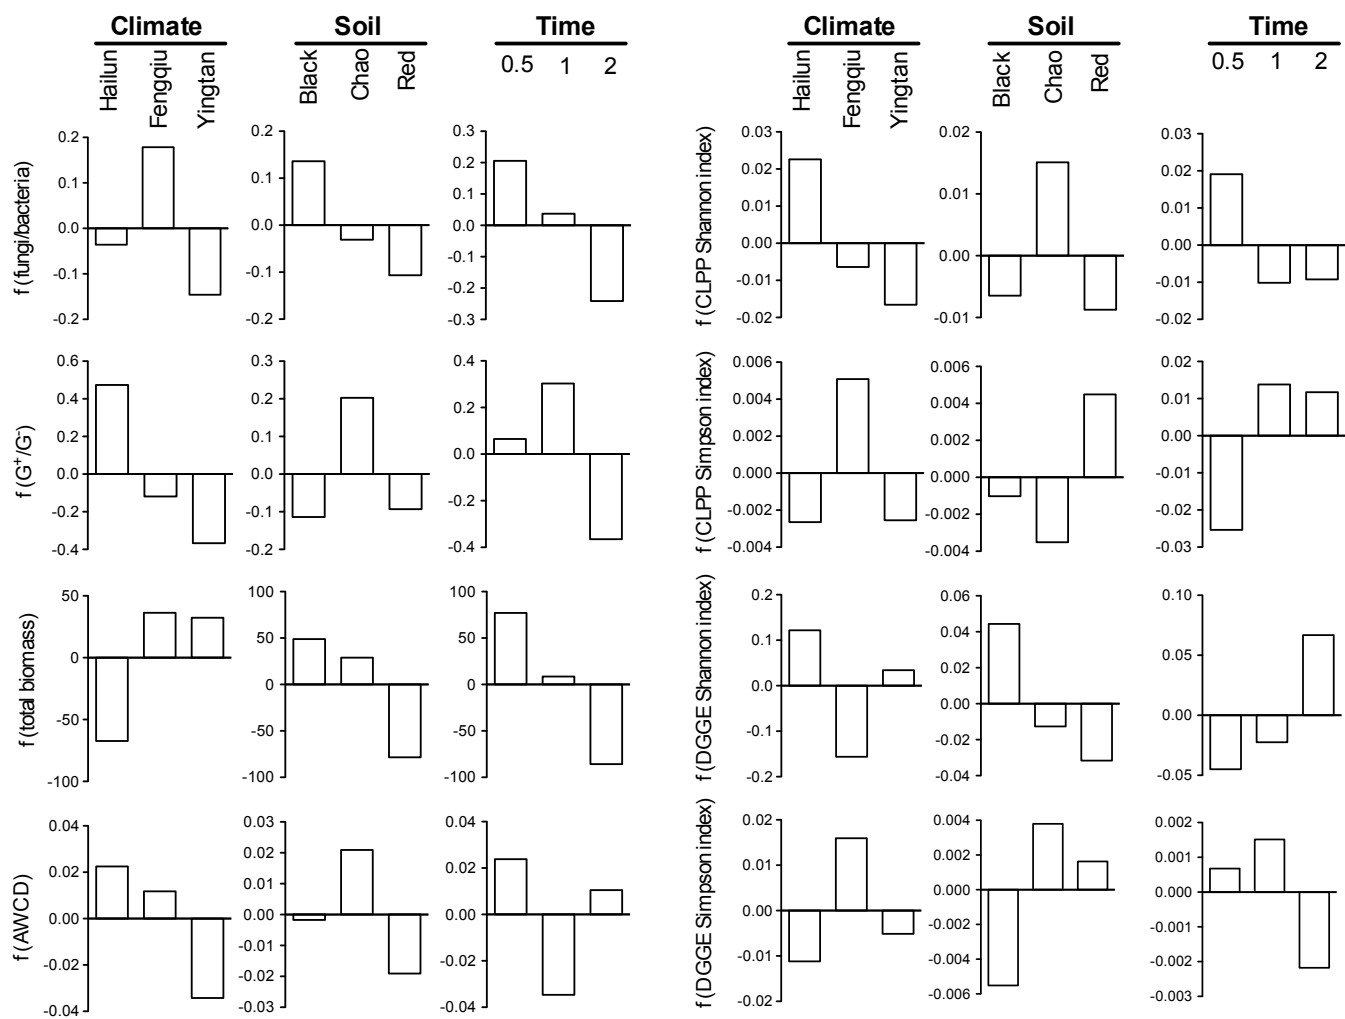

**Fig. S4.** Partial dependency plots for the aggregated boosted tree (ABT) analysis of fungi/bacteria,  $G^+/G^-$  bacteria, total biomass and the community-level physiological profiles (AWCD) and DGGE in terms of the Shannon's and Simpson's indices. The associated importance scores are shown in Table 1.

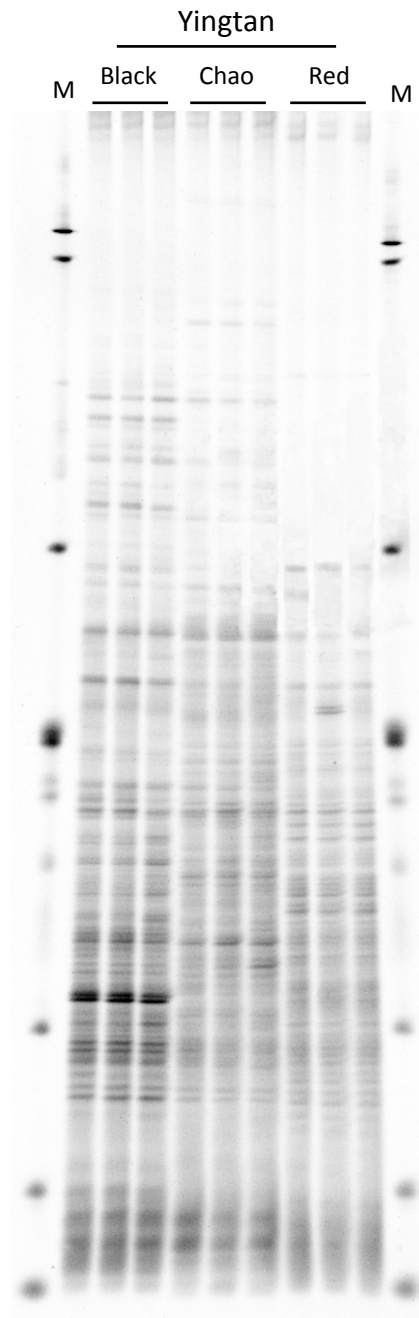

**Figure S5.** A representative photograph of DGGE gel of microbial communities from the three bulk soils located in Yingtan. Soil samples were taken at the beginning of the straw decomposition and the analysis was performed with 3 replicates for each soil. M: DNA ladder N3233 from New England BioLabs (UK) Ltd.

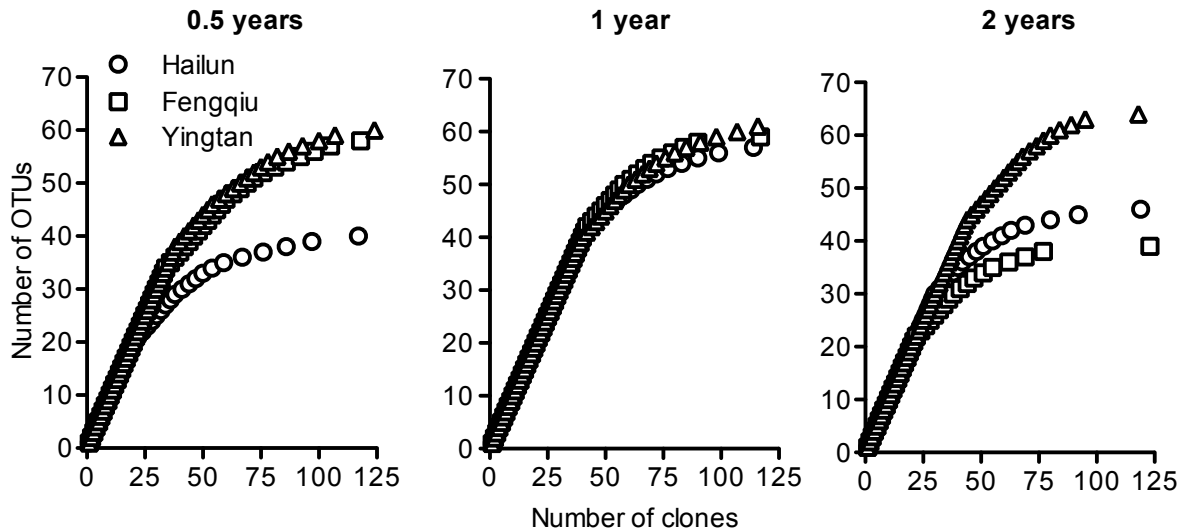

**Fig. S6.** Rarefaction curve of the total number of unique restriction profiles (OTUs) against the total number of clones for each of the nine residue samples.

**Table S1.** Chemical properties of the soils at the beginning of the reciprocal soil transplantation (Time 0).

| Soil <sup>a</sup> | pH          | OM<br>(g/kg) | TN<br>(g/kg) | TP<br>(g/kg) | TK<br>(g/kg) | AP<br>(mg/kg) | AK<br>(mg/kg) |
|-------------------|-------------|--------------|--------------|--------------|--------------|---------------|---------------|
| Black             | 6.06 ± 0.03 | 52.99 ± 0.35 | 2.47 ± 0.05  | 0.27 ± 0.00  | 13.62 ± 0.11 | 31.13 ± 1.15  | 150.1 ± 7.0   |
| Chao              | 8.23 ± 0.02 | 8.35 ± 0.16  | 0.66 ± 0.01  | 0.18 ± 0.03  | 12.99 ± 0.22 | 11.80 ± 3.04  | 68.9 ± 0.1    |
| Red               | 4.98 ± 0.01 | 8.28 ± 0.16  | 0.79 ± 0.13  | 0.07 ± 0.00  | 7.93 ± 0.10  | 27.46 ± 2.88  | 180.5 ± 2.7   |

<sup>a</sup>Data are means and standard errors of three replicates: OM, organic matter; TN, total nitrogen; TP, total phosphate; TK, total potassium; AP, available phosphate; AK, available potassium.

**Table S2.** Chemical properties of soils at the end of the maize straw decomposition experiment (2 years after the straw burial and 4.5 years after soil transplantation).

| Soil <sup>a</sup> | Location        | pH          | OM<br>(g/kg) | TN<br>(g/kg) | TP<br>(g/kg) | TK<br>(g/kg) | AP<br>(mg/kg) | AK<br>(mg/kg) |
|-------------------|-----------------|-------------|--------------|--------------|--------------|--------------|---------------|---------------|
| <b>Black</b>      | <b>Hailun</b>   | 6.25 ± 0.09 | 46.39 ± 0.45 | 1.79 ± 0.16  | 0.79 ± 0.01  | 18.69 ± 0.04 | 39.57 ± 2.19  | 201.7 ± 23.2  |
| Black             | Fengqiu         | 6.33 ± 0.03 | 43.85 ± 1.34 | 2.02 ± 0.10  | 0.85 ± 0.01  | 19.40 ± 0.39 | 45.93 ± 7.06  | 168.3 ± 8.0   |
| Black             | Yingtian        | 6.20 ± 0.01 | 41.34 ± 0.24 | 1.66 ± 0.02  | 0.80 ± 0.01  | 18.98 ± 0.17 | 33.85 ± 0.40  | 164.2 ± 0.8   |
| Chao              | Hailun          | 7.87 ± 0.05 | 9.49 ± 0.54  | 0.59 ± 0.06  | 0.58 ± 0.01  | 16.97 ± 0.22 | 8.74 ± 2.02   | 129.2 ± 9.3   |
| <b>Chao</b>       | <b>Fengqiu</b>  | 7.90 ± 0.08 | 8.72 ± 0.25  | 0.56 ± 0.01  | 0.73 ± 0.07  | 20.60 ± 2.20 | 7.31 ± 0.15   | 99.2 ± 4.4    |
| Chao              | Yingtian        | 8.05 ± 0.03 | 7.93 ± 0.41  | 0.50 ± 0.09  | 0.58 ± 0.03  | 18.32 ± 0.65 | 8.69 ± 0.49   | 71.7 ± 4.6    |
| Red               | Hailun          | 5.11 ± 0.01 | 9.59 ± 0.46  | 0.56 ± 0.01  | 0.32 ± 0.01  | 9.78 ± 0.17  | 12.93 ± 0.82  | 202.5 ± 5.2   |
| Red               | Fengqiu         | 5.75 ± 0.08 | 10.27 ± 0.08 | 0.66 ± 0.14  | 0.45 ± 0.01  | 10.38 ± 0.18 | 21.82 ± 1.28  | 208.3 ± 13.1  |
| <b>Red</b>        | <b>Yingtian</b> | 5.28 ± 0.05 | 9.83 ± 0.08  | 0.58 ± 0.03  | 0.44 ± 0.00  | 9.73 ± 0.28  | 17.27 ± 0.40  | 109.2 ± 0.8   |

<sup>a</sup>Data are means and standard errors of three replicates: OM, organic matter; TN, total nitrogen; TP, total phosphate; TK, total potassium; AP, available phosphate; AK, available potassium.  
Data of soils in their original location are highlighted in bold format.

**Table S3.** Comparison of pH values between bulk soil and residual maize straw buried at the same site.

| Soil <sup>a</sup> | Location | Soil        | Maize residue |
|-------------------|----------|-------------|---------------|
| Black             | Hailun   | 6.26 ± 0.10 | 7.24 ± 0.11   |
| Black             | Fengqiu  | 5.97 ± 0.05 | 7.29 ± 0.01   |
| Black             | Yingtian | 6.50 ± 0.08 | 7.47 ± 0.03   |
| Chao              | Hailun   | 7.68 ± 0.14 | 7.44 ± 0.02   |
| Chao              | Fengqiu  | 7.70 ± 0.12 | 7.48 ± 0.07   |
| Chao              | Yingtian | 7.24 ± 0.47 | 7.62 ± 0.01   |
| Red               | Hailun   | 5.80 ± 0.15 | 7.21 ± 0.06   |
| Red               | Fengqiu  | 6.54 ± 0.54 | 7.76 ± 0.07   |
| Red               | Yingtian | 5.97 ± 0.22 | 7.26 ± 0.04   |

<sup>a</sup>Data are means and standard errors of three replicates and samples were taken at 1 year after the straw burial (i.e., ~3.5 years after soil transplantation).



**Table S4.** Climate conditions at the experimental sites during the period of straw decomposition experiment.

| Location <sup>a</sup> | Time (year) | Temperature (°C) | Relative humidity (%) | Precipitation (mm) |
|-----------------------|-------------|------------------|-----------------------|--------------------|
| Hailun                | 0.5         | 12.5             | 54.0                  | 65.0               |
|                       | 1           | 3.5              | 53.7                  | 36.9               |
|                       | 2           | 2.0              | 64.3                  | 40.1               |
| Fengqiu               | 0.5         | 20.6             | 74.3                  | 50.1               |
|                       | 1           | 14.8             | 69.8                  | 36.1               |
|                       | 2           | 14.1             | 70.3                  | 32.6               |
| Yingtian              | 0.5         | 24.2             | 67.0                  | 120.3              |
|                       | 1           | 19.0             | 72.7                  | 133.6              |
|                       | 2           | 16.3             | 71.6                  | 83.3               |

<sup>a</sup>Data shown are monthly average during the whole period of straw decomposition.

**Table S5.** Multivariate analysis of the decomposition rate and microbial biomass (PLFA) of residual maize straws.

Results are three-way crossed ANOVA with climate conditions (Hailun, Fengqiu, Yingtian), soil types (Black soil, Chao soil, Red soil), decomposition time (0.5 year, 1 year, 2 year) as the fixed factors.

| Source             | Rate of straw decomposition       |         |              |                                |         |              | Microbial biomass (PLFA) |         |              |
|--------------------|-----------------------------------|---------|--------------|--------------------------------|---------|--------------|--------------------------|---------|--------------|
|                    | relative decrease of C/N per year |         |              | Residual loss of mass per year |         |              |                          |         |              |
|                    | DF                                | F ratio | Significance | DF                             | F ratio | Significance | DF                       | F ratio | Significance |
| location           | 2                                 | 50.731  | 0.000        | 2                              | 92.943  | 0.000        | 2                        | 16.317  | 0.000        |
| soil               | 2                                 | 5.191   | 0.009        | 2                              | 17.638  | 0.000        | 2                        | 10.262  | 0.000        |
| time               | 2                                 | 16.328  | 0.000        | 2                              | 883.585 | 0.000        | 3                        | 8.051   | 0.000        |
| location*soil      | 4                                 | 1.510   | 0.212        | 4                              | 2.166   | 0.085        | 4                        | 3.313   | 0.016        |
| location*time      | 4                                 | 13.051  | 0.000        | 4                              | 13.908  | 0.000        | 6                        | 5.186   | 0.000        |
| soil*time          | 4                                 | 1.598   | 0.188        | 4                              | 1.765   | 0.149        | 5                        | 5.122   | 0.001        |
| location*soil*time | 8                                 | 1.041   | 0.417        | 8                              | 2.499   | 0.022        | 9                        | 2.697   | 0.010        |
| Error              | 54                                |         |              | 54                             |         |              | 64                       |         |              |
| Total              | 81                                |         |              | 81                             |         |              | 96                       |         |              |
| Corrected total    | 80                                |         |              | 80                             |         |              | 95                       |         |              |

**Table S6.** Multivariate analysis of microbial biomass (PLFA).

Results are two-way crossed ANOVA with climate conditions (Hailun, Fengqiu, Yingtan), soil types (black soil, chao soil, red soil) as the fixed factors.

| Source          | 0.5 year |         |              | 1 year |         |              | 2 year |         |              |
|-----------------|----------|---------|--------------|--------|---------|--------------|--------|---------|--------------|
|                 | DF       | F ratio | Significance | DF     | F ratio | Significance | DF     | F ratio | Significance |
| location        | 2        | 4.017   | 0.036        | 2      | 1.938   | 0.173        | 2      | 3.528   | 0.051        |
| soil            | 2        | 5.339   | 0.015        | 2      | 2.596   | 0.102        | 2      | 0.078   | 0.925        |
| location*soil   | 4        | 1.440   | 0.261        | 4      | 3.534   | 0.027        | 4      | 2.000   | 0.138        |
| Error           | 18       |         |              | 18     |         |              | 18     |         |              |
| Total           | 27       |         |              | 27     |         |              | 27     |         |              |
| Corrected total | 26       |         |              | 26     |         |              | 26     |         |              |

**Table S7.** Multivariate analysis of microbial functional diversity (CLPP).

Results are three-way crossed ANOVA with climate conditions (Hailun, Fengqiu, Yingtan), soil types (Black soil, Chao soil, Red soil), decomposition time (0.5 year, 1 year, 2 year) as the fixed factors.

| Source             | AWCD |         |              | Simpson's index |         |              | Shannon's index |         |              |
|--------------------|------|---------|--------------|-----------------|---------|--------------|-----------------|---------|--------------|
|                    | DF   | F ratio | Significance | DF              | F ratio | Significance | DF              | F ratio | Significance |
| location           | 2    | 20.224  | 0.000        | 2               | 7.133   | 0.002        | 2               | 6.605   | 0.003        |
| soil               | 2    | 7.807   | 0.001        | 2               | 4.748   | 0.013        | 2               | 4.259   | 0.019        |
| time               | 2    | 20.526  | 0.000        | 2               | 65.166  | 0.000        | 2               | 4.673   | 0.013        |
| location*soil      | 4    | 5.647   | 0.001        | 4               | 3.752   | 0.009        | 4               | 4.098   | 0.006        |
| location*time      | 4    | 9.513   | 0.000        | 4               | 3.577   | 0.012        | 4               | 6.794   | 0.000        |
| soil*time          | 4    | 9.579   | 0.000        | 4               | 8.515   | 0.000        | 4               | 5.900   | 0.001        |
| location*soil*time | 8    | 5.506   | 0.000        | 8               | 4.727   | 0.000        | 8               | 4.106   | 0.001        |
| Error              | 54   |         |              | 54              |         |              | 54              |         |              |
| Total              | 81   |         |              | 81              |         |              | 81              |         |              |
| Corrected total    | 80   |         |              | 80              |         |              | 80              |         |              |

**Table S8.** Multivariate analysis of phylogenetic diversity (DGGE).

Results are three-way crossed ANOVA with climate conditions (Hailun, Fengqiu, Yingtan), soil types (Black soil, Chao soil, Red soil), decomposition time (0.5 year, 1 year, 2 year) as the fixed factors.

| Source             | Shannon's index |         |              | Simpson's index |         |              |
|--------------------|-----------------|---------|--------------|-----------------|---------|--------------|
|                    | DF              | F ratio | Significance | DF              | F ratio | Significance |
| location           | 2               | 34.192  | 0.000        | 2               | 16.204  | 0.000        |
| soil               | 2               | 2.826   | 0.068        | 2               | 1.552   | 0.221        |
| time               | 2               | 5.642   | 0.006        | 2               | 0.757   | 0.474        |
| location*soil      | 4               | 0.901   | 0.470        | 4               | 0.979   | 0.427        |
| location*time      | 4               | 14.804  | 0.000        | 4               | 3.420   | 0.015        |
| soil*time          | 4               | 1.039   | 0.396        | 4               | 0.075   | 0.990        |
| location*soil*time | 8               | 4.047   | 0.001        | 8               | 1.977   | 0.067        |
| Error              | 54              |         |              | 54              |         |              |
| Total              | 81              |         |              | 81              |         |              |
| Corrected total    | 80              |         |              | 80              |         |              |

**Table S9.** Similarity of the straw-decomposing bacterial populations in Black soil located in three geographic regions as estimated by Sørensen similarity index of the RFLP data.

|        | HL-0.5       | FQ-0.5       | YT-0.5       | HL-1  | FQ-1  | YT-1  | HL-2  | FQ-2  | YT-2 |
|--------|--------------|--------------|--------------|-------|-------|-------|-------|-------|------|
| HL-0.5 | 1            |              |              |       |       |       |       |       |      |
| FQ-0.5 | 0.408        | 1            |              |       |       |       |       |       |      |
| YT-0.5 | 0.320        | 0.339        | 1            |       |       |       |       |       |      |
| HL-1   | <b>0.454</b> | 0.383        | 0.410        | 1     |       |       |       |       |      |
| FQ-1   | 0.343        | <b>0.444</b> | 0.403        | 0.397 | 1     |       |       |       |      |
| YT-1   | 0.416        | 0.403        | <b>0.446</b> | 0.492 | 0.417 | 1     |       |       |      |
| HL-2   | <b>0.269</b> | 0.279        | 0.306        | 0.248 | 0.325 | 0.288 | 1     |       |      |
| FQ-2   | 0.329        | <b>0.351</b> | 0.303        | 0.313 | 0.265 | 0.380 | 0.252 | 1     |      |
| YT-2   | 0.327        | 0.377        | <b>0.371</b> | 0.347 | 0.341 | 0.448 | 0.219 | 0.330 | 1    |

Note: bacterial populations are designated by the location (HL, Hailun; FQ, Fengqiu; YT, Yingtian) and the time of sampling (0.5, 1 or 2 years) which are separated by a hyphen.
